# Supplementary material for: Disease-Specific Changes in Reelin Protein and mRNA in Neurodegenerative Diseases
Source: MDPI journal article supplement (doi:10.3390/cells9051252), 2020-05-19
Supplement: s1 [file s1]

**Table S1.** List of the quantified cases in the study

Control (nND) cases

| Gender | Age | Biobank         | Sample |
|--------|-----|-----------------|--------|
| Male   | 58  | HC              | FT     |
| Male   | 76  | HC              | FT     |
| Male   | 62  | HC              | FT     |
| Female | 74  | HC              | FT     |
| Male   | 70  | HC              | FT     |
| Female | 81  | HC              | FT     |
| Male   | 78  | HC              | FT     |
| Male   | 83  | HC              | FT     |
| Male   | 78  | HC              | FT     |
| Male   | 64  | HC              | FT     |
| Male   | 86  | HC              | FT     |
| Female | 90  | HC              | FT     |
| Female | 88  | HC              | FT     |
| Female | 73  | HC              | FT     |
| Female | 83  | HC              | FT     |
| Female | 74  | HC              | FT     |
| Female | 86  | HC              | FT     |
| Male   | 69  | HUB-ICO-IDIBELL | FT     |
| Male   | 64  | HUB-ICO-IDIBELL | FT     |
| Male   | 67  | HUB-ICO-IDIBELL | FT     |
| Male   | 74  | HUB-ICO-IDIBELL | FT     |
| Male   | 86  | HUB-ICO-IDIBELL | FT     |
| Female | 73  | HUB-ICO-IDIBELL | FT     |
| Male   | 70  | HUB-ICO-IDIBELL | FT     |
| Male   | 85  | HUB-ICO-IDIBELL | FT     |
| Male   | 62  | HUB-ICO-IDIBELL | FT     |
| Male   | 59  | HUB-ICO-IDIBELL | FT     |
| Male   | 39  | HUB-ICO-IDIBELL | FT     |
| Male   | 78  | HUB-ICO-IDIBELL | FT     |
| Male   | 61  | HUB-ICO-IDIBELL | FT     |
| Male   | 84  | HUB-ICO-IDIBELL | FT     |
| Male   | 72  | HUB-ICO-IDIBELL | FT     |
| Male   | 65  | HUB-ICO-IDIBELL | FT     |
| Male   | 25  | HUB-ICO-IDIBELL | FT     |
| Male   | 43  | HUB-ICO-IDIBELL | FT     |
| Male   | 59  | HUB-ICO-IDIBELL | FT     |
| Male   | 56  | HUB-ICO-IDIBELL | FT     |
| Male   | 43  | HUB-ICO-IDIBELL | FT     |
| Male   | 56  | HUB-ICO-IDIBELL | FT     |
| Female | 65  | HUB-ICO-IDIBELL | FT     |
| Female | 66  | HUB-ICO-IDIBELL | FT     |
| Male   | 68  | HSP             | CSF    |

|        |    |     |     |
|--------|----|-----|-----|
| Female | 65 | HSP | CSF |
| Female | 55 | HSP | CSF |
| Male   | 61 | HSP | CSF |
| Female | 59 | HSP | CSF |
| Female | 68 | HSP | CSF |
| Male   | 67 | HSP | CSF |
| Female | 56 | HSP | CSF |
| Male   | 59 | HSP | CSF |
| Male   | 56 | HSP | CSF |
| Female | 58 | HSP | CSF |
| Female | 56 | HSP | CSF |
| Male   | 58 | HSP | CSF |
| Male   | 65 | HSP | CSF |
| Female | 61 | HSP | CSF |
| Male   | 64 | HSP | CSF |
| Male   | 63 | HSP | CSF |
| Male   | 62 | HSP | CSF |
| Female | 71 | HSP | CSF |
| Male   | 70 | HSP | CSF |
| Male   | 70 | UMG | CSF |
| Male   | 22 | UMG | CSF |
| Female | 66 | UMG | CSF |
| Female | 38 | UMG | CSF |
| Male   | 56 | UMG | CSF |
| Female | 47 | UMG | CSF |

Mild cognitive impairment (MCI) with AD markers cases

| Gender | Age | Biobank | Sample |
|--------|-----|---------|--------|
| Female | 71  | HMT     | CSF    |
| Male   | 74  | HMT     | CSF    |
| Male   | 65  | HMT     | CSF    |
| Male   | 75  | HMT     | CSF    |
| Female | 87  | HMT     | CSF    |
| Female | 71  | HMT     | CSF    |
| Female | 64  | HMT     | CSF    |
| Female | 74  | HMT     | CSF    |
| Female | 70  | HMT     | CSF    |
| Female | 57  | HMT     | CSF    |
| Male   | 64  | HMT     | CSF    |
| Female | 81  | HMT     | CSF    |
| Male   | 65  | HMT     | CSF    |
| Male   | 73  | HMT     | CSF    |
| Female | 75  | HMT     | CSF    |
| Male   | 84  | HMT     | CSF    |
| Female | 85  | HMT     | CSF    |
| Male   | 69  | HMT     | CSF    |
| Female | 77  | HMT     | CSF    |
| Male   | 67  | HMT     | CSF    |

AD Dementia cases

| Gender | Age | Biobank | Sample |
|--------|-----|---------|--------|
| Female | 70  | HMT     | CSF    |
| Male   | 77  | HMT     | CSF    |
| Female | 61  | HMT     | CSF    |
| Female | 78  | HMT     | CSF    |
| Male   | 66  | HMT     | CSF    |
| Male   | 79  | HMT     | CSF    |
| Male   | 72  | HMT     | CSF    |
| Female | 81  | HMT     | CSF    |
| Male   | 72  | HMT     | CSF    |
| Male   | 52  | HMT     | CSF    |
| Male   | 71  | HMT     | CSF    |
| Female | 53  | HMT     | CSF    |
| Female | 72  | HMT     | CSF    |
| Male   | 81  | HMT     | CSF    |
| Female | 65  | HMT     | CSF    |
| Male   | 85  | HMT     | CSF    |
| Male   | 69  | HMT     | CSF    |
| Female | 69  | HMT     | CSF    |
| Female | 62  | HMT     | CSF    |
| Female | 55  | HMT     | CSF    |
| Male   | 79  | HMT     | CSF    |
| Female | 81  | HMT     | CSF    |
| Male   | 58  | HMT     | CSF    |
| Male   | 69  | HSP     | CSF    |
| Male   | 63  | HSP     | CSF    |
| Male   | 82  | HSP     | CSF    |
| Male   | 60  | HSP     | CSF    |
| Male   | 57  | HSP     | CSF    |
| Male   | 69  | HSP     | CSF    |

AD cases (III-IV)

| Gender | Age | Biobank         | Sample |
|--------|-----|-----------------|--------|
| Female | 67  | HUB-ICO-IDIBELL | FT     |
| Female | 71  | HUB-ICO-IDIBELL | FT     |
| Male   | 69  | HUB-ICO-IDIBELL | FT     |
| Male   | 64  | HUB-ICO-IDIBELL | FT     |
| Female | 90  | HUB-ICO-IDIBELL | FT     |
| Male   | 83  | HUB-ICO-IDIBELL | FT     |
| Female | 81  | HUB-ICO-IDIBELL | FT     |
| Female | 77  | HUB-ICO-IDIBELL | FT     |
| Female | 84  | HUB-ICO-IDIBELL | FT     |
| Female | 84  | HUB-ICO-IDIBELL | FT     |
| Male   | 84  | HUB-ICO-IDIBELL | FT     |
| Male   | 79  | HUB-ICO-IDIBELL | FT     |

AD cases (V-VI)

| Gender | Age | Biobank         | Sample |
|--------|-----|-----------------|--------|
| Male   | 75  | HC              | FT     |
| Male   | 90  | HC              | FT     |
| Female | 77  | HC              | FT     |
| Female | 87  | HC              | FT     |
| Male   | 85  | HC              | FT     |
| Female | 81  | HC              | FT     |
| Female | 85  | HC              | FT     |
| Female | 86  | HC              | FT     |
| Female | 89  | HC              | FT     |
| Male   | 79  | HC              | FT     |
| Male   | 81  | HC              | FT     |
| Female | 73  | HC              | FT     |
| Male   | 92  | HC              | FT     |
| Male   | 88  | HC              | FT     |
| Female | 93  | HC              | FT     |
| Female | 75  | HC              | FT     |
| Male   | 78  | HC              | FT     |
| Female | 81  | HC              | FT     |
| Male   | 77  | HC              | FT     |
| Female | 90  | HC              | FT     |
| Female | 88  | HC              | FT     |
| Female | 93  | HC              | FT     |
| Male   | 88  | HC              | FT     |
| Female | 77  | HC              | FT     |
| Male   | 83  | HC              | FT     |
| Male   | 92  | HC              | FT     |
| Female | 83  | HC              | FT     |
| Female | 90  | HC              | FT     |
| Male   | 87  | HC              | FT     |
| Female | 82  | HC              | FT     |
| Female | 85  | HC              | FT     |
| Female | 92  | HC              | FT     |
| Male   | 81  | HC              | FT     |
| Female | 81  | HC              | FT     |
| Female | 80  | HC              | FT     |
| Female | 88  | HC              | FT     |
| Female | 88  | HC              | FT     |
| Male   | 79  | HC              | FT     |
| Female | 90  | HC              | FT     |
| Female | 87  | HC              | FT     |
| Female | 90  | HC              | FT     |
| Female | 86  | HC              | FT     |
| Male   | 85  | HC              | FT     |
| Female | 82  | HUB-ICO-IDIBELL | FT     |
| Female | 56  | HUB-ICO-IDIBELL | FT     |
| Male   | 87  | HUB-ICO-IDIBELL | FT     |

|        |    |                 |    |
|--------|----|-----------------|----|
| Female | 75 | HUB-ICO-IDIBELL | FT |
| Male   | 87 | HUB-ICO-IDIBELL | FT |
| Male   | 75 | HUB-ICO-IDIBELL | FT |
| Male   | 82 | HUB-ICO-IDIBELL | FT |
| Male   | 77 | HUB-ICO-IDIBELL | FT |
| Female | 96 | HUB-ICO-IDIBELL | FT |
| Female | 67 | HUB-ICO-IDIBELL | FT |

PDD cases

| Gender | Age | Biobank | Sample |
|--------|-----|---------|--------|
| Female | 69  | HC      | FT     |
| Male   | 81  | HC      | FT     |
| Female | 70  | HC      | FT     |
| Male   | 76  | HC      | FT     |
| Female | 77  | HC      | FT     |
| Female | 70  | HC      | FT     |
| Female | 79  | HC      | FT     |
| Male   | 71  | HC      | FT     |
| Female | 87  | HC      | FT     |
| Male   | 68  | HC      | FT     |
| Female | 73  | HC      | FT     |
| Female | 77  | HC      | FT     |
| Male   | 72  | HC      | FT     |
| Female | 81  | HC      | FT     |
| Male   | 73  | HC      | FT     |
| Female | 87  | HC      | FT     |
| Female | 71  | HC      | FT     |
| Male   | 74  | HC      | FT     |
| Male   | 77  | HC      | FT     |
| Female | 77  | HC      | FT     |
| Male   | 80  | HC      | FT     |
| Male   | 77  | HC      | FT     |
| Female | 88  | HC      | FT     |
| Female | 84  | HC      | FT     |
| Female | 81  | HC      | FT     |
| Male   | 68  | HC      | FT     |
| Male   | 82  | HC      | FT     |
| Male   | 80  | HC      | FT     |
| Female | 69  | HC      | FT     |
| Male   | 81  | HC      | FT     |
| Female | 87  | HC      | FT     |
| Male   | 74  | HC      | FT     |
| Male   | 78  | HC      | FT     |
| Male   | 71  | HC      | FT     |
| Male   | 81  | HC      | FT     |
| Female | 83  | HC      | FT     |
| Female | 90  | HC      | FT     |
| Male   | 62  | HC      | FT     |

|        |    |     |     |
|--------|----|-----|-----|
| Female | 81 | HC  | FT  |
| Male   | 83 | HC  | FT  |
| Female | 73 | HMT | CSF |
| Male   | 65 | HMT | CSF |
| Male   | 73 | HMT | CSF |
| Female | 72 | HMT | CSF |
| Female | 80 | HMT | CSF |
| Male   | 55 | HMT | CSF |
| Male   | 74 | HMT | CSF |
| Male   | 74 | HMT | CSF |
| Female | 71 | HMT | CSF |
| Female | 70 | HMT | CSF |
| Male   | 65 | HMT | CSF |

#### sCJD cases

| Gender | Age | PrP Type | Biobank         | Sample |
|--------|-----|----------|-----------------|--------|
| Female | 61  | ND       | UMG             | CSF    |
| Male   | 76  | ND       | UMG             | CSF    |
| Female | 73  | ND       | UMG             | CSF    |
| Female | 76  | ND       | UMG             | CSF    |
| Male   | 59  | ND       | UMG             | CSF    |
| Male   | 66  | ND       | UMG             | CSF    |
| Female | 71  | ND       | UMG             | CSF    |
| Female | 66  | ND       | UMG             | CSF    |
| Male   | 72  | ND       | UMG             | CSF    |
| Male   | 25  | 1        | HUB-ICO-IDIBELL | FT     |
| Male   | 79  | 1        | HUB-ICO-IDIBELL | FT     |
| Female | 82  | 1        | HUB-ICO-IDIBELL | FT     |
| Female | 63  | 1        | HUB-ICO-IDIBELL | FT     |
| Female | 54  | 1        | HUB-ICO-IDIBELL | FT     |
| Female | 65  | 1        | HUB-ICO-IDIBELL | FT     |
| Male   | 52  | 1        | HUB-ICO-IDIBELL | FT     |
| Male   | 61  | 1        | HUB-ICO-IDIBELL | FT     |
| Female | 60  | 1        | HUB-ICO-IDIBELL | FT     |
| Male   | 56  | 1        | HUB-ICO-IDIBELL | FT     |
| Male   | 74  | 1        | HUB-ICO-IDIBELL | FT     |
| Female | 87  | 1        | HUB-ICO-IDIBELL | FT     |
| Female | 85  | 1        | HUB-ICO-IDIBELL | FT     |
| Female | 70  | 1        | HUB-ICO-IDIBELL | FT     |
| Male   | 55  | 1        | HUB-ICO-IDIBELL | FT     |
| Male   | 73  | 2        | HUB-ICO-IDIBELL | FT     |
| Female | 67  | 2        | HUB-ICO-IDIBELL | FT     |
| Female | 63  | 2        | HUB-ICO-IDIBELL | FT     |
| Female | 76  | 2        | HUB-ICO-IDIBELL | FT     |
| Female | 52  | 2        | HUB-ICO-IDIBELL | FT     |
| Male   | 76  | 2        | HUB-ICO-IDIBELL | FT     |
| Female | 77  | 2        | HUB-ICO-IDIBELL | FT     |
| Male   | 5   | 2        | HUB-ICO-IDIBELL | FT     |

|        |    |   |                 |    |
|--------|----|---|-----------------|----|
| Female | 61 | 2 | HUB-ICO-IDIBELL | FT |
| Male   | 73 | 2 | HUB-ICO-IDIBELL | FT |
| Female | 76 | 2 | HUB-ICO-IDIBELL | FT |
| Female | 72 | 1 | HUB-ICO-IDIBELL | FT |
| Male   | 46 | 1 | HUB-ICO-IDIBELL | FT |
| Male   | 64 | 1 | HUB-ICO-IDIBELL | FT |
| Male   | 65 | 1 | HUB-ICO-IDIBELL | FT |
| Male   | 70 | 1 | HUB-ICO-IDIBELL | FT |
| Male   | 66 | 2 | HUB-ICO-IDIBELL | FT |
| Female | 76 | 2 | HUB-ICO-IDIBELL | FT |
| Male   | 65 | 2 | HUB-ICO-IDIBELL | FT |
| Female | 47 | 2 | HUB-ICO-IDIBELL | FT |
| Male   | 54 | 2 | HUB-ICO-IDIBELL | FT |

**Abbreviations.**

CSF = Cerebrospinal fluid for protein analysis

ND = Non determined

FT = Frozen Tissue for protein and RNA analysis

HC = Hospital Clinic

HMT = Hospital Mutua de Terrassa

HSP = Hospital de Santa Creu i Sant Pau

HUB-ICO-IDIBELL = Hospital de Bellvitge and the Oncology Institute

UMG = Universitätsmedizin Göttingen
