# Supplementary material for: Disease-Specific Changes in Reelin Protein and mRNA in Neurodegenerative Diseases
Source: MDPI journal article supplement (doi:10.3390/cells9051252), 2020-05-19
Supplement: s1 [file s1]

**Table S2:** Characteristics of the antibodies used.

| Antibody               | Mono-/polyclonal  | Dilution | Supplier     | Country        |
|------------------------|-------------------|----------|--------------|----------------|
| AT8 (Ser202/Thr205)    | Monoclonal        | 1:500    | Innogenetics | Ghent, BE      |
| $\beta$ -Amyloid       | Monoclonal        | 1:50     | Boehringer   | Germany        |
| CD68                   | Monoclonal        | 1:100    | Dako         | Glostrup, DK   |
| GFAP                   | Rabbit polyclonal | 1:250    | Dako         | Glostrup, DK   |
| Ubiquitin              | Rabbit polyclonal | 1:200    | Dako         | Glostrup, DK   |
| PrP (3F4)              | Monoclonal        | 1:1000   | Dako         | Glostrup, DK   |
| $\alpha$ B-crystallin  | Monoclonal        | 1:100    | Adcam        | Cambridge, USA |
| $\alpha$ -Synuclein    | Rabbit polyclonal | 1:500    | Millipore    | Billerica, USA |
| $\alpha$ -Reelin (142) | Monoclonal        | 1:500    | Chemicon     | Billerica, USA |
| $\alpha$ -Reelin (G19) | Monoclonal        | 1:500    | Chemicon     | Billerica, USA |
| Tubulin                | Monoclonal        | 1:5000   | Sigma        | UK             |
